# Supplementary material for: Two-dimensional nickel cyano-bridged coordination polymer thermally derived potent electrocatalysts for alkaline hydrogen evolution reaction
Source: Royal Society of Chemistry journal article supplement (doi:10.1039/d3ta04511k), 2023-01-01
Supplement: d3ta04511k1.pdf [file d3ta04511k1.pdf]

## Supporting Information

### **Two-dimensional nickel cyano-bridged coordination polymer thermally derived potent electrocatalysts for alkaline hydrogen evolution reaction**

Manar M. Abdel Naby<sup>1,2</sup>, Mohamed B. Zakaria<sup>3,4\*</sup>, Haitham M. El-Bery<sup>5</sup>, Gehad G. Mohamed<sup>1,6</sup>, Mohamed E. El-Khouly<sup>1\*</sup>

<sup>1</sup>Institute of Basic and Applied Science, Egypt-Japan University of Science and Technology (E-JUST), New Borg El-Arab City, Alexandria, Egypt

<sup>2</sup>Department of Chemistry, Faculty of Science, Ain Shams University, Cairo, Egypt

<sup>3</sup>Department of Chemistry, Faculty of Science, Tanta University, 31527 Tanta, Egypt

<sup>4</sup>Alexander von Humboldt (AvH) Foundation, 53173 Bonn, Germany

<sup>5</sup>Department of Chemistry, Faculty of Science, Assiut University, Assiut, Egypt

<sup>6</sup>Department of Chemistry, Faculty of Science, Cairo University, Cairo, Egypt

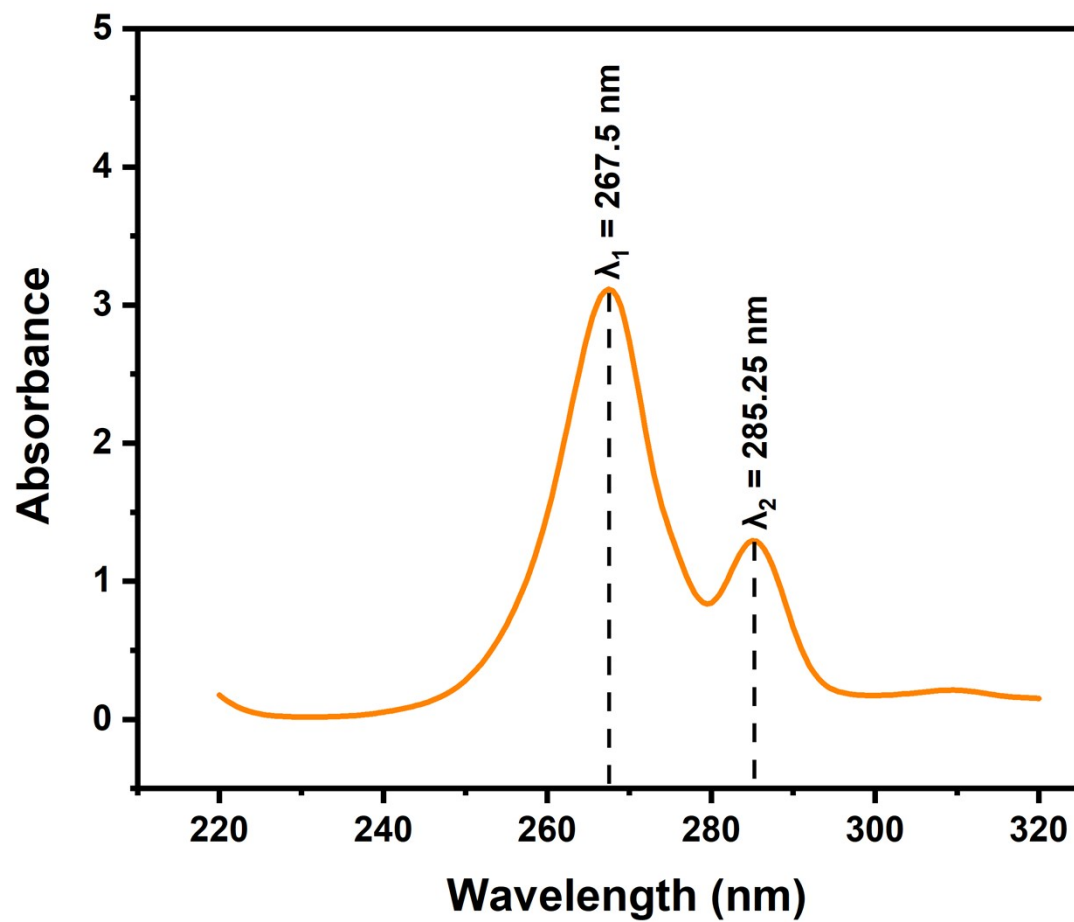

Fig. S1. UV absorption spectrum of potassium tetracyanonickelate complex  $\text{K}_2[\text{Ni}(\text{CN})_4] \cdot x\text{H}_2\text{O}$ .

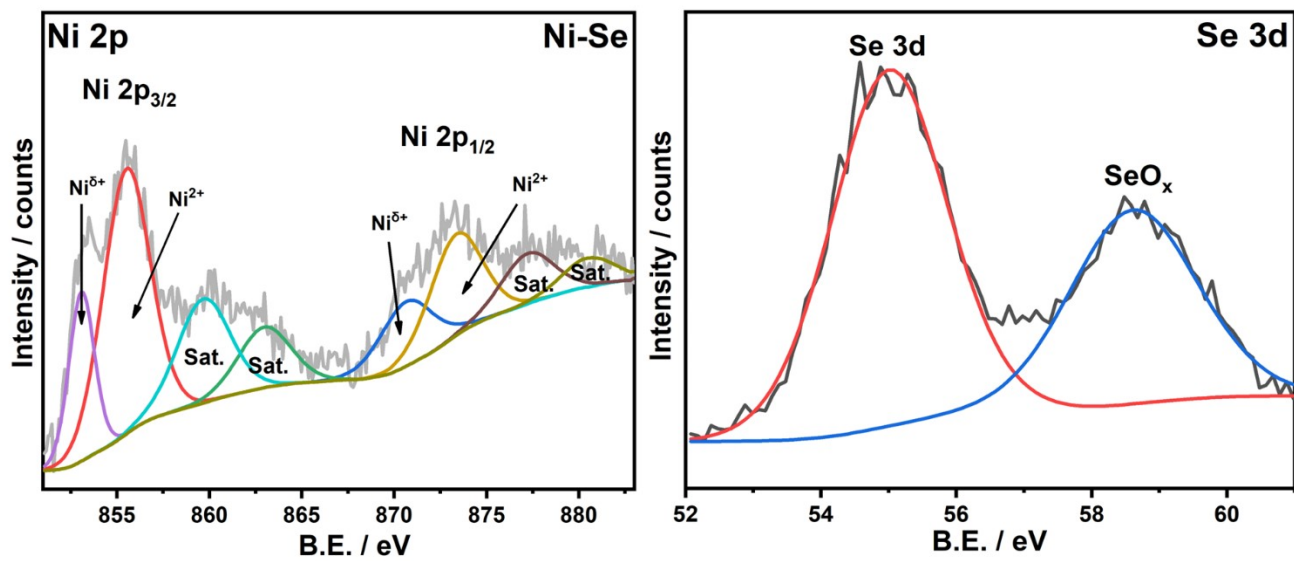

Fig. S2. XPS spectra of the core levels of Ni 2p and Se 3d.

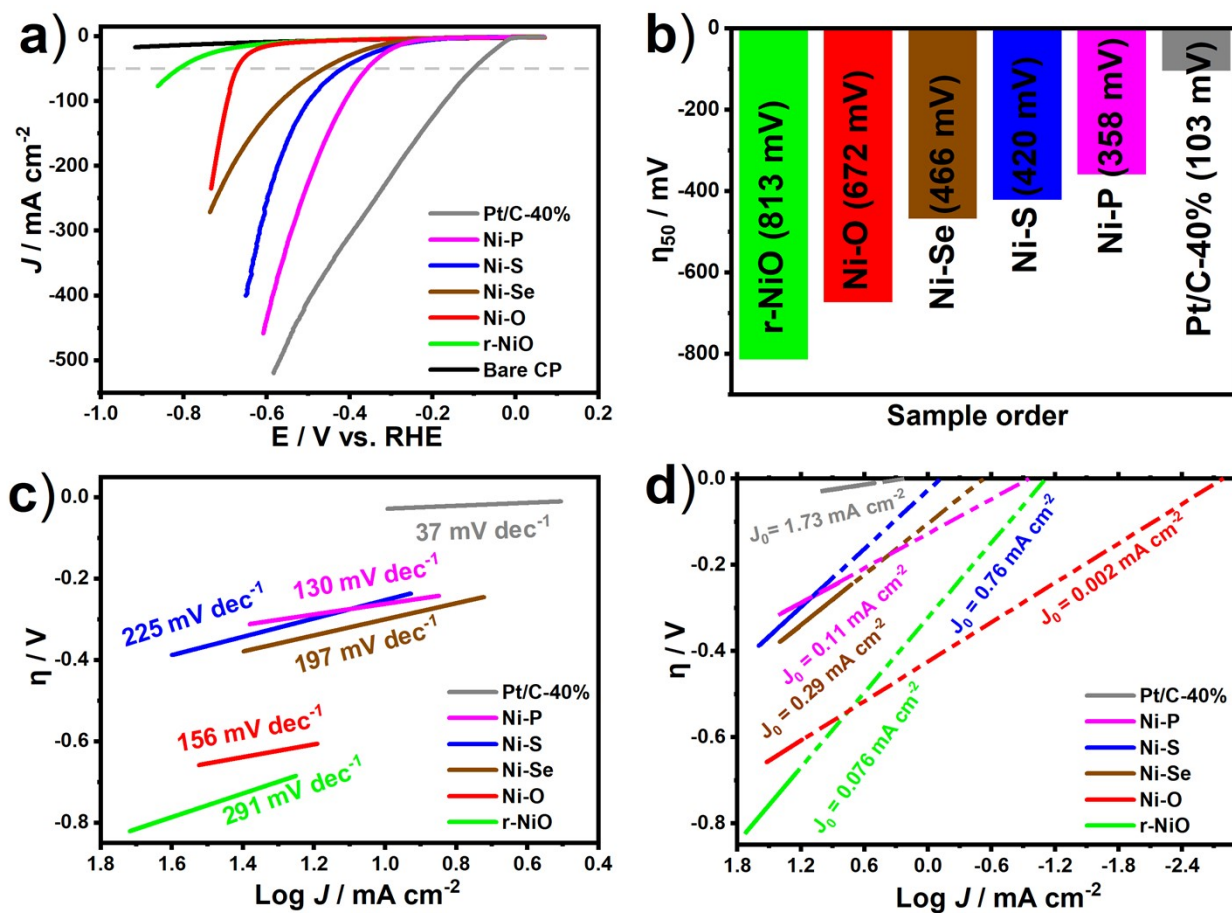

**Fig. S3.** (a) LSV curves after  $iR_s$ -compensation at a scan rate of  $10 \text{ mV S}^{-1}$ , (b) the overpotential value of each electrode at a current density of  $50 \text{ mA cm}^{-2}$ , (c) the corresponding Tafel plots of Ni-O, Ni-S, Ni-Se, Ni-P, r-NiO, and Pt/C-40% electrodes, and (d) the estimated exchange currents related to Tafel plots of each electrode.

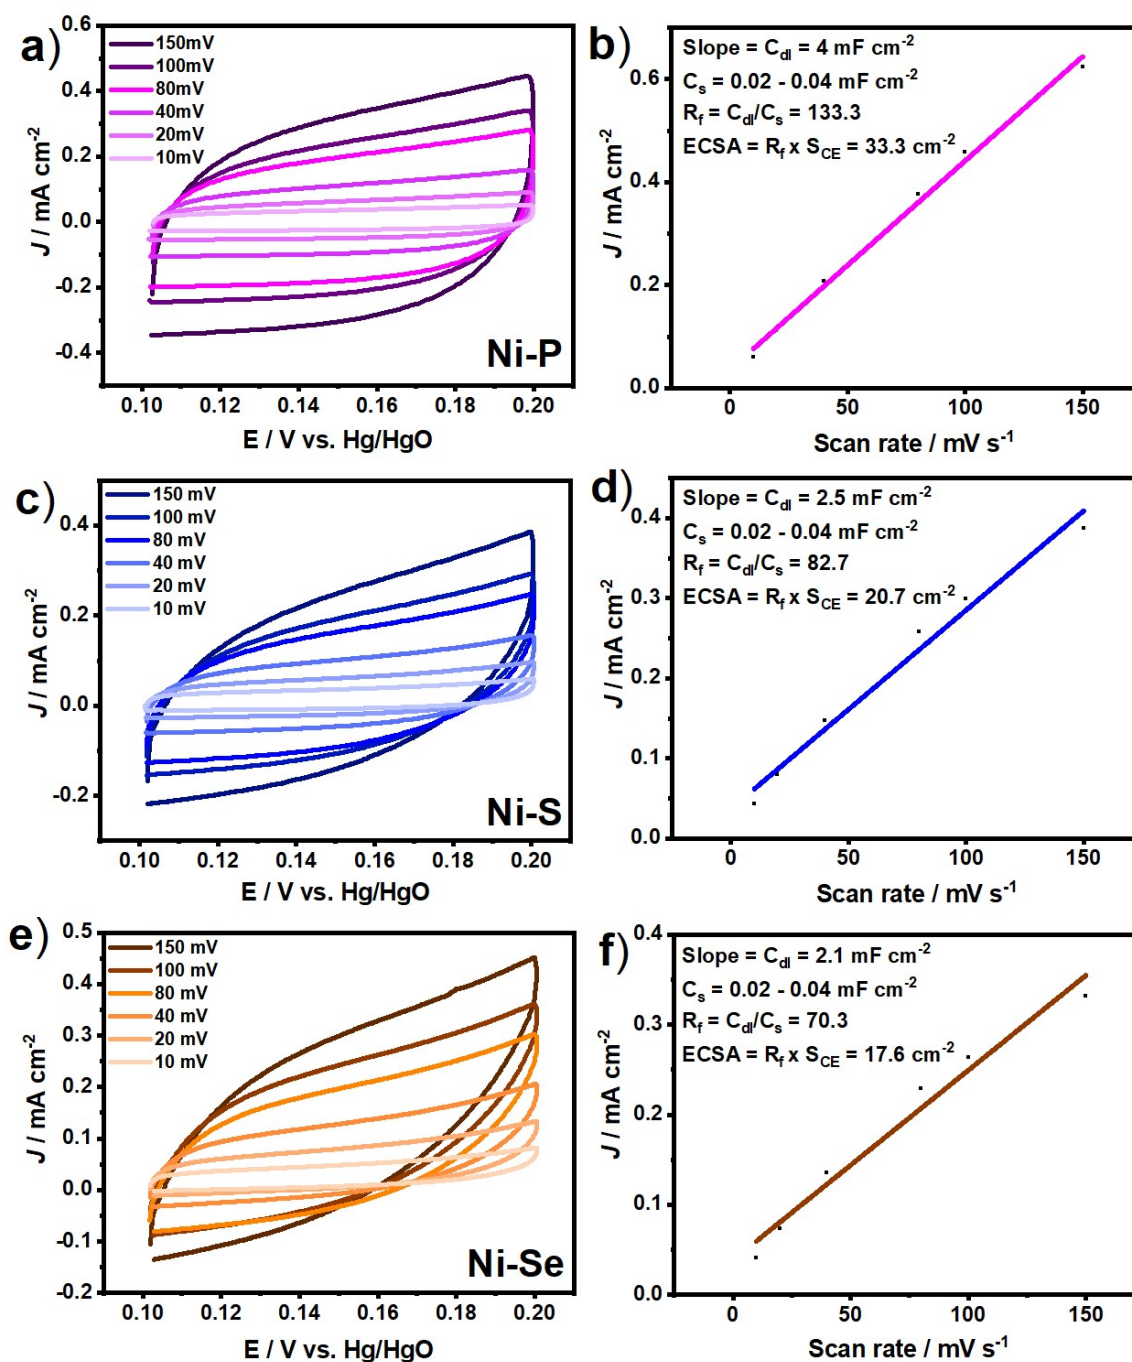

**Fig. S4.** a, c, e) CV at different scan rates (10, 20, 40, 80, 100, and 150 mV s<sup>-1</sup>), b, d, f) double layer charging current versus scan rate curves of Ni-P, Ni-S and Ni-Se.

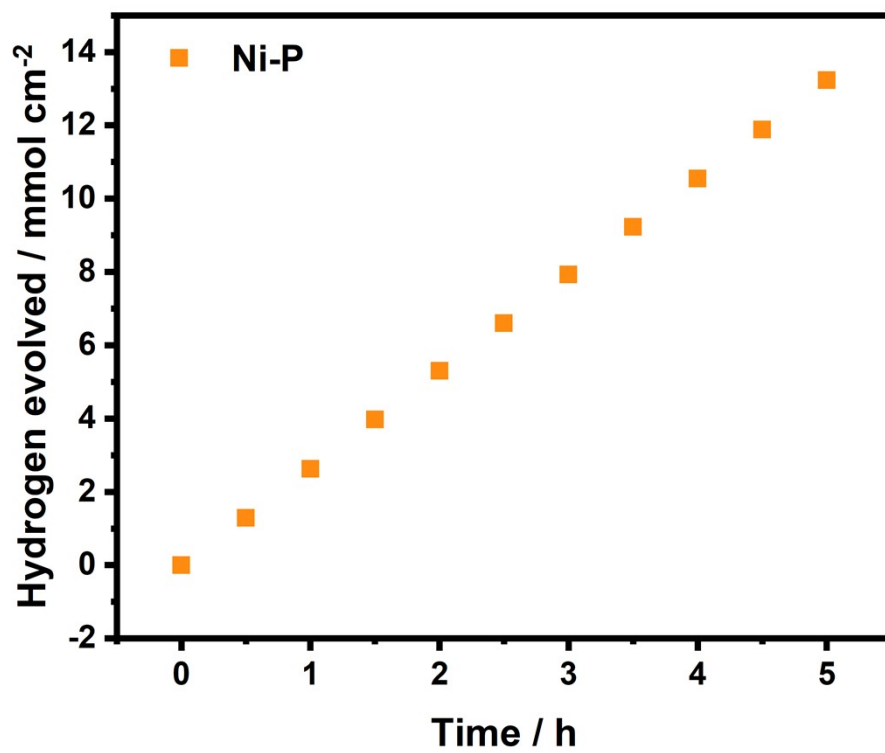

Fig. S5. The time course of H<sub>2</sub> evolution via on-line GC-TCD system for Ni-P.
